1 **Novel splicing and open reading frames revealed by long-read direct RNA sequencing of**  
2 **adenovirus transcripts**

3

4 Alexander M. Price<sup>1</sup>, Katharina E. Hayer<sup>2</sup>, Daniel P. Depledge<sup>3</sup>, Angus C. Wilson<sup>4</sup>, and Matthew  
5 D. Weitzman<sup>1,5</sup>

6

7 <sup>1</sup>Division of Protective Immunity, Department of Pathology and Laboratory Medicine, The  
8 Children's Hospital of Philadelphia, Philadelphia, PA

9 <sup>2</sup>Department of Biomedical and Health Informatics, The Children's Hospital of Philadelphia,  
10 Philadelphia, PA

11 <sup>3</sup>Department of Medicine, New York University School of Medicine, New York, NY

12 <sup>4</sup>Department of Microbiology, New York University School of Medicine, New York, NY

13 <sup>5</sup>Department of Pathology and Laboratory Medicine, University of Pennsylvania Perelman  
14 School of Medicine, Philadelphia, PA

15

16 Contact Information:

17 [weitzmanm@email.chop.edu](mailto:weitzmanm@email.chop.edu)

18

19

20 **Abstract**

21 Adenovirus is a common human pathogen that relies on host cell processes for production  
22 and processing of viral RNA. Although adenoviral promoters, splice junctions, and cleavage and  
23 polyadenylation sites have been characterized using low-throughput biochemical techniques or  
24 short read cDNA-based sequencing, these technologies do not fully capture the complexity of the  
25 adenoviral transcriptome. By combining Illumina short-read and nanopore long-read direct RNA  
26 sequencing approaches, we mapped transcription start sites and cleavage and polyadenylation  
27 sites across the adenovirus genome. The canonical viral early and late RNA cassettes were  
28 confirmed, but analysis of splice junctions within long RNA reads revealed an additional 20 novel  
29 viral transcripts. These RNAs include seven new splice junctions which lead to expression of  
30 canonical open reading frames (ORF), as well as 13 transcripts encoding for messages that  
31 potentially alter protein functions through truncations or the fusion of canonical ORFs. In addition,  
32 we also detect RNAs that bypass canonical cleavage sites and generate potential chimeric  
33 proteins by linking separate gene transcription units. Our work highlights how long-read  
34 sequencing technologies can reveal further complexity within viral transcriptomes.

35

## 36 Introduction

37 Adenoviruses (AdV) are common viral pathogens across multiple species with distinct  
38 tissue tropisms including gut, eye, and lung [1]. Among the human adenoviruses, serotypes 2  
39 (Ad2) and 5 (Ad5) from subgroup C are the most prevalent within the population, and they cause  
40 benign to severe respiratory infections [2]. These two serotypes are highly homologous, sharing  
41 94.7% nucleotide identity between their genomes and 69.2-100% amino acid identity amongst  
42 conserved open reading frames (ORFs) [3,4]. AdVs readily infect most transformed human cell  
43 lines and have proven a valuable tool that has led to seminal discoveries in molecular biology for  
44 many decades [5]. RNA splicing was discovered by the analysis of adenovirus encoded RNAs  
45 [6,7], as well as other important findings in messenger RNA capping and polyadenylation [8,9]. It  
46 is now understood that essentially all AdV mRNAs are capped, spliced, polyadenylated, and  
47 exported from the nucleus using host cell machinery [10].

48 AdV are capable of infecting non-dividing cells and reprogramming cellular processes for  
49 productive viral infection. This rewiring involves a highly regulated cascade of viral gene  
50 expression over various kinetic classes [5]. The first viral gene to be expressed after infection is  
51 E1A, a multi-functional transcription factor that activates downstream viral transcription, liberates  
52 E2F from RB proteins, as well as alters host transcriptional responses to the virus [11–14]. While  
53 all E1A molecules have identical 5' and 3' nucleotide sequences, splicing of differently sized  
54 internal introns allows for the production of discrete proteins that lack specific functional domains  
55 conserved across serotypes [15]. Early after infection, E1A is expressed mainly as large and small  
56 isoforms, but later in infection alternative splicing leads to the production of a 9 Svedberg E1A  
57 isoform (E1A-9s) as well as low abundance doubly-spliced E1A-11s and E1A-10s. The second  
58 viral gene to be activated is E1B, consisting of predominantly two spliced isoforms producing 19-  
59 kilodalton and 55-kilodalton proteins, with two less abundant isoforms generating putative ORFs  
60 of 156 and 93 residues [16]. While E1B-19K acts to block cellular apoptosis [17], E1B-55K is  
61 another multifunctional protein that can cooperate with E1A to alter cellular gene expression  
62 downstream of p53 as well as form the targeting component of a viral ubiquitin ligase [18–23].  
63 The remaining early transcription units are all transcriptionally activated by E1A and encode for  
64 products of related function. The E2 region on the reverse strand of the AdV genome has both an  
65 early and a late promoter, as well as two distinct polyadenylation sites, leading to upstream E2A  
66 and downstream E2B transcripts [24]. E2A encodes for the viral DNA-binding protein (DBP), while  
67 alternative splicing to E2B encodes for the protein-priming terminal protein (pTP) as well as the  
68 AdV DNA polymerase (AdPol) [25–27]. The E3 region encoded on the top strand also has two

69 polyadenylation sites leading to E3A and E3B transcription units, and these gene products are  
70 primarily involved in modulating the host innate immune system [28–30]. Like E1A, the E4 region  
71 on the reverse strand has identical 5' and 3' regions, and encodes up to six ORFs by removal of  
72 a first intron of varying length. E4 region transcripts encode for multifunctional proteins that are  
73 involved in regulation of transcription, splicing, and translation of viral RNAs, as well as  
74 antagonizing intrinsic cellular defenses [31–33]. Additionally, AdV encodes two Pol III-derived  
75 virus associated (VA) RNAs involved in the inactivation of Protein Kinase acting on RNA (PKR)  
76 [34,35]. Ultimately, the concerted efforts of the AdV early proteins lead to a cellular state that  
77 allows for the replication and amplification of the viral DNA genome [36].

78         Prior to viral DNA replication, the AdV Major Late Promoter (MLP) is thought to be largely  
79 silent with small amounts of RNA being made that terminate at the immediately downstream (L1)  
80 polyadenylation site [37]. At this time, so-called intermediate genes pIX and IVa2 begin to be  
81 expressed from promoters within the E1B cassette and antisense to the MLP. Both pIX and IVa2  
82 co-terminate at polyadenylation sites within the early genes they overlap with (E1B and E2B,  
83 respectively) and are involved in late gene transcription and packaging [38,39]. Only after viral  
84 DNA replication has occurred does the MLP fully activate, supporting the hypothesis that that  
85 active replication *in cis* is a prerequisite for full viral late gene expression [40–42]. The Major Late  
86 Transcriptional Unit (MLTU) begins with a series of three constitutive exons spliced together to  
87 form the tripartite leader, before downstream splicing to late cassettes defined by one of five  
88 alternative polyadenylation sites (termed L1-L5) [37]. Splicing within the tripartite leader to the so-  
89 called “i” exon leads to a putative ORF upstream of subsequent late gene splicing events and  
90 destabilizes these RNA molecules [43,44]. An additional intermediate promoter has been reported  
91 within the L4 region that allows for the early expression of L4-22K and L4-33K proteins important  
92 for the splicing of other late genes [45,46]. The MLTU encodes for primarily structural capsid  
93 components or proteins involved with packaging of new virions, and their expression ultimately  
94 leads to the death of the host cell. Recently, a novel late gene, UXP, was discovered on the  
95 reverse strand of the genome [47,48]. The UXP promoter is located between E4 and E2 on the  
96 reverse strand of the genome, and splices downstream to the exons within the E2A region to  
97 continue translation of an ORF in an alternate reading frame to that of DBP. This exciting finding  
98 suggests that our knowledge of AdV transcripts is incomplete, especially within the complex  
99 MLTU region.

100         The Ad5 genome was fully sequenced in 1991 using Sanger sequencing of viral genome  
101 fragments inserted into plasmid DNA and amplified in bacteria [3]. This genome sequence was

102 then annotated in 2003 based on homology to similar serotypes of AdV [4]. As such, the current  
103 reference annotation for Ad5 available on the National Center for Biotechnology Information  
104 ([AC\\_000008](#)) is incomplete, and lacks critical information such as transcription start sites (TSS),  
105 cleavage and polyadenylation sites (CPAS), and the resulting 5' and 3' untranslated regions  
106 (UTR) that the aforementioned information dictates. In recent years, new technologies have  
107 allowed for high-throughput investigation of gene expression utilizing various techniques. The  
108 effect of AdV infection on host gene expression has been shown for Ad5 by microarray analysis  
109 [49,50], as well as for Ad2 by Illumina-based short-read sequencing [51,52]. Analyses of both  
110 single-end and paired-end short-read RNA-seq data from cells infected with Ad2 revealed both  
111 temporal viral gene expression and high-depth splicing information and identified both previously  
112 confirmed and novel RNA splice site junctions [53]. In addition, temporal analysis of Ad5 viral  
113 gene expression was performed using digital PCR to determine expression kinetics of a subset  
114 of known viral genes [54]. Lastly, the late RNA tripartite leader splicing was analyzed by short-  
115 read sequencing across a number of human AdV serotypes [43]. To date, no group has performed  
116 a comprehensive analysis of the RNAs generated during Ad5 infection. Furthermore, even though  
117 the quality and depth of current short-read sequencing technologies is high, the complex nature  
118 of many viral transcriptomes precludes the unambiguous mapping of these short reads to any  
119 one particular RNA isoform due to extreme gene density and overlapping transcriptional units  
120 [55,56]. In this regard, the ability of long-read RNA sequencing to map full-length transcripts has  
121 the potential to revolutionize detection of divergent isoforms and multiply spliced RNA at the  
122 single-molecule level [57–59].

123 In this study, we have re-annotated the Ad5 genome and transcriptome using a  
124 combination of short-read and long-read RNA sequencing technologies. The high read depth and  
125 accuracy of base-calling achieved by Illumina-based short-read sequencing allowed for both the  
126 detection of single nucleotide polymorphisms within transcriptionally active regions of the viral  
127 DNA genome, as well as error-correction of the inherently noisier base-calling of Nanopore-based  
128 long-read direct RNA sequencing (dRNA-seq). dRNA-seq enabled the detection of full-length  
129 RNA transcripts and the assignment of TSS and CPAS transcriptome-wide. Furthermore, by  
130 combining highly accurate splice site junctions from short-read sequencing and full-length isoform  
131 context from long-read sequencing, we were able to reevaluate the splicing complexity of AdV  
132 transcriptional units. Using this integrated approach, we have discovered 20 additional viral  
133 polyadenylated RNAs for a total of 75 unique mRNAs produced by Ad5. Of these novel isoforms,  
134 seven RNAs encode for a canonical ORF with changes in upstream or downstream splicing. The  
135 remaining 13 encode new ORFs or alter existing ORFs by internal truncations or in-frame fusion

136 of genes from separate transcription units. Taken together, our data reveal additional  
137 transcriptional complexity of AdV and highlight the necessity of revisiting transcriptome  
138 annotations following the emergence of appropriate new technologies.

139

## 140 **Results**

### 141 **RNA-seq reveals high-confidence SNPs within the Ad5 genome**

142 Illumina-based RNA sequencing (RNA-seq) relies on the fractionation of RNA molecules  
143 before reverse transcription into complementary DNA, and therefore loses information such as  
144 RNA modifications and the context of splice junctions within full length molecules. However, the  
145 accuracy of each individual base call is very high [60]. Using bcftools, a common variant-calling  
146 algorithm designed to assess allele-specific variation within RNA-seq, we were able to detect  
147 single nucleotide polymorphisms (SNPs) within the RNA transcriptome that likely emerge from  
148 mutation within the DNA genome [61,62]. While RNA modifications such as inosine can be read  
149 as SNPs during the process of reverse transcription, these events should not approach the near  
150 100% read depth stringency we required among our three biological replicates to call a conserved  
151 variant [63]. While this technique is only applicable for the actively transcribed region of the  
152 genome, nearly every nucleotide of the gene-dense AdV genome is transcribed at a sufficient  
153 level for this strategy to provide meaningful data.

154 In total, we discovered 24 SNPs and no insertions or deletions in the Ad5 genome when  
155 compared to the original annotation (**Figure 1**). Of these mutations, exactly half (12) are not  
156 predicted to change amino acid coding capacity, with two SNPs occurring within untranslated  
157 regions of viral RNA and the remaining ten leading to synonymous amino acid codons within all  
158 reading frames annotated to be protein producing. The remaining 12 mutations are predicted to  
159 lead to coding sequence variations at the amino acid level, with all examples being missense  
160 mutations and no evidence of premature stop codons. Importantly, none of the mutations  
161 discovered generated novel RNA splice sites. These data demonstrate the ability to call mutations  
162 within the DNA genomes of viruses using solely high-depth RNA sequencing data. Furthermore,  
163 detecting only 24 SNPs out of 35,938 nucleotides highlights the overall genomic stability of AdV.

164

165 **Combined short-read and long-read sequencing showcases adenovirus transcriptome**  
166 **complexity**

167 To compare short-read Illumina sequencing and long-read nanopore sequencing directly,  
168 A549 cells were infected with Ad5 for 24 hours and total RNA was harvested in biological triplicate.  
169 Fractions of these three samples were prepared into standard strand specific Illumina RNA-seq  
170 libraries using the polyadenylated mRNA fraction. The same RNA samples were then poly(A)  
171 purified before submitting to direct RNA sequencing (dRNA-seq) on an Oxford Nanopore  
172 Technologies MinION MkIb platform [64]. Resulting sequence reads were aligned to the Ad5  
173 reference genome using either GSNAP for short-reads [65], or MiniMap2 for long-reads [66].  
174 Overall sequencing depth for both forward and reverse reads are shown in **Figure 2**. While  
175 Illumina sequencing provided on average three times the read depth when compared to dRNA  
176 sequencing, the overall coverage plots were similar.

177 dRNA-seq is performed in the 3' -> 5' direction and thus allows precise mapping of the 3'  
178 ends of transcripts at which poly(A) tails are added (cleavage and polyadenylation site, CPAS)  
179 [64]. Where the quality of input RNA is high, a variable proportion of sequence reads extend all  
180 the way to their transcription start site (TSS). By collapsing sequences reads to their 5' and 3'  
181 ends, we were able to implement a peak-calling approach to predict TSS and CPAS [57], and  
182 map their positions along both the forward and reverse strand of the viral genome (**Figure 2**). In  
183 addition, ContextMap2 [67] was used to mine Illumina RNA-seq data for short read sequences  
184 containing poly(A) stretches that could be aligned against the viral genome for an orthogonal  
185 method of CPAS detection (**Figure 2**). Mapping the TSS on the forward strand revealed the  
186 locations of the E1A, E1B, pIX, MLP, and E3 promoters, while the reverse strand revealed the  
187 E4, UXP, E2-early, E2-late, and IVa2 promoters. We did not detect any transcripts starting internal  
188 to L4 at the proposed L4 promoter [45]. When mapping CPAS loci, we saw great concordance  
189 between the dRNA-seq and ContextMap2 performed on short-read sequences. On the forward  
190 strand we were able to detect previously mapped CPAS events at the E1A, E1B/pIX, E3A, E3B,  
191 and individual L1 through L5 sites. On the reverse strand we detected CPAS at the E4, UXP/DBP,  
192 and E2B/IVa2 locations. In addition, we also detected TSS and CPAS around the RNA pol III-  
193 derived VA RNA I (**Figure 2**). While pol III transcripts are generally not polyadenylated, and thus  
194 would not be captured by our nanopore sequencing approach, it was previously reported that low  
195 levels of polyadenylation can occur on these transcripts [68]. Given the high abundance of AdV  
196 VA RNAs (up to  $10^8$  copies per cell during late infection), it remains likely that low level VA RNA  
197 polyadenylation events are occurring [35].

198 To generate accurate splicing maps of AdV transcripts we combined the sensitivity of  
199 short-read sequencing to identify RNA junctions and then placed them in the context of full-length

200 RNA isoforms using dRNA sequencing. Due to the spurious nature of low-level AdV splicing  
201 events [53], we set abundance thresholds for the highly abundant viral late transcripts of 500  
202 reads for short-read junctions, and at least ten events detected in the long-read sequencing when  
203 collapsed by FLAIR [69]. Using this method, we readily detected other recently discovered viral  
204 isoforms, such as multiple splice sites preceding the pVII ORF [53], the so-called X, Y, and Z  
205 leaders embedded in E3 and preceding L5-Fiber [53,70], and the newly described UXP [47,48].  
206 Using full-length RNAs, we were able to detect novel splice sites producing canonical ORFs that  
207 only differ in UTRs for L4-100K, L4-33K, L4-pVIII, and E4orf6/7. In addition, we discovered  
208 canonical ORF isoforms embedded within transcripts generated from non-canonical promoters,  
209 such as Fiber driven by the E3 promoter, E3-10K driven by the Major Late Promoter, and DBP  
210 driven by the E4 promoter. Within transcriptional units, we discovered the presence of internal  
211 splice sites leading to in-frame truncations of existing ORFs, such as L4-22K and four distinct  
212 isoforms of truncated L4-100K. We also discovered splicing events predicted to lead to in-frame  
213 fusion events within transcriptional units, such as fusions between N-terminal fragments of L4-  
214 100K and L4-33K or L4-pVIII or the X-Z-Fiber ORF. Furthermore, gene fusion events were  
215 observed that join disparate transcriptional units, such as an N-terminal fragment of E1B-19K and  
216 pIX (19K/IX) or E4orf6 and DBP (E4orf6/DBP). Lastly, we detected a splice site leading to a novel  
217 ORF of predicted 13 kilodaltons (L2-Unk13K) between the splice sites for L2-V and L2-pX. This  
218 novel L2 splice site was conserved in Ad2 [53]. Overall, we discovered 20 new isoforms for a total  
219 of 75 expressed RNA isoforms during Ad5 infection. Of these, many potentially exciting fusions  
220 and truncations of existing ORFs remain to be explored.

221

## 222 **Direct RNA Sequencing unambiguously distinguishes early and late transcription**

223 We next determined if we could provide unambiguous detection of viral transcripts over a  
224 time-course of infection that recapitulated early and late viral kinetics. By aligning long reads to  
225 the fully re-annotated viral transcriptome (as opposed to the viral genome), and only counting the  
226 reads that could be unambiguously assigned to a single transcript, we were able to detect all of  
227 the canonical and newly discovered transcripts (**Figure 3**). At 12 hours post infection (hpi) the  
228 majority of viral transcripts detected were early RNAs, particularly E1A-large and E1A-small, E1B-  
229 19K and E1B-55K, early promoter DBP, and E4orf3 (**Figure 3A**). However, at this time point we  
230 still detected low-level viral late transcripts that progressed beyond the L1 polyadenylation site,  
231 corroborating recent work [54]. At 24 hpi, however, viral gene expression shifted to be dominated  
232 by late gene expression, as well as early transcripts derived from the E1B locus (**Figure 3B**). At



233 late times post infection we also saw the E3-Fiber transcript, 19K/IX, and E4-DBP transcripts  
234 increase dramatically, potentially implicating these messages as novel late transcripts, with  
235 expression as abundant as the recently described late UXP transcript [47,48]. Furthermore, while  
236 all permutations of the X, Y, and Z leaders preceding Fiber were previously detected by short-  
237 read sequencing these could not be phased to full-length transcript isoforms [53,70]. Our full-  
238 length RNA data indicate that all Fiber transcripts can be detected, but MLP-Fiber and Y-Fiber  
239 are the most abundant, followed by XY-Fiber, and then all other isoforms. While the previous lack  
240 of detection of some of these novel transcripts can be explained by low overall abundance (e.g.,  
241 L2-Unk13K, L4-100K/VIII) many of the L4-100K truncations and L4-33K fusions are expressed at  
242 levels higher than that of the bona fide late transcript UXP. These data demonstrate that the newly  
243 discovered viral transcripts can be reproducibly detected over a time-course of infection with Ad5,  
244 as well as display differential expression based on the stage of infection.

245

## 246 **Discussion**

247 DNA viruses encode large amounts of information in compact genomes through  
248 alternative splicing, overlapping transcripts, and transcription from both strands of the genome.  
249 The complexity of the adenovirus transcriptome has not been fully explored using modern high-  
250 throughput technologies. Here we integrate short-read cDNA sequencing and long-read direct  
251 RNA sequencing to re-annotate both the Ad5 DNA genome and RNA transcriptome. Using high  
252 quality and high depth short-read sequencing, we were able to detect SNPs within the transcribed  
253 regions of the genome approaching 100% penetrance, indicating that these sites were likely  
254 present in the genome and not due to RNA editing or modifications. We recapitulated the known  
255 TSS and CPAS sites throughout the Ad5 genome, and annotated novel splicing events within the  
256 viral transcriptome. Of these 20 novel RNAs, 13 are likely to encode for altered ORFs including  
257 multiple fusion transcripts that span transcriptional units thought previously to be distinct. Overall,  
258 we have provided a more complete annotation of a complex viral transcriptome that highlights  
259 potentially new gene products for future study.

260 Using RNA-seq data to call SNPs in viral DNA genomes is compelling since high quality  
261 short-read sequencing data sets already exist for many DNA viruses [71–75]. While half of the  
262 SNPs we called were synonymous or in non-coding regions, missense mutations have the  
263 potential to change the coding sequence of protein amino acids in meaningful ways. In addition,  
264 while SNPs are often tolerated during alignment of RNA-seq data, annotation of the correct

265 primary amino acid sequence is critical for downstream analysis of mass spectrometry data [76].  
266 While the SNPs we detected might be bona fide mutations that have arisen during passage in cell  
267 culture, it is also possible that the original reference sequence contains errors introduced by the  
268 sequencing technologies employed at the time [3,4]. It will be critical to directly sequence the DNA  
269 genomes of Ad5 isolates from multiple laboratories to test this hypothesis.

270 Previous studies of AdV transcription detected numerous splice sites beyond those  
271 employed by known isoforms. However, the constraints of short-read sequencing precluded  
272 proper assembly of these sites into full-length transcripts [43,53,70]. Furthermore, targeted  
273 expression analysis over a time-course of infection was limited to already known transcripts [54].  
274 Using direct RNA sequencing we have been able to confirm that these RNAs exist (e.g., the  
275 various x, y, and z leaders preceding some molecules of Fiber transcripts), as well as show  
276 regulated expression over a time-course of infection. We have also added ORF predictions to  
277 previously detected splice sites, such as L2-Unk13K, X-Z-Fiber, and the pVIII ORF derived from  
278 splicing directly from the tripartite leader to the L4-33K splice acceptor. While this last site was  
279 previously predicted to lead to the expression of a small 42 amino acid ORF [53], we propose that  
280 this transcript instead primarily encodes for pVIII with a small upstream ORF, as it is over five  
281 times as abundant as the canonical pVIII spliced RNA. It should be noted that we did not detect  
282 the presence of a putative L4 intermediate promoter TSS at either 12 or 24 hpi [45,77,78]. One  
283 hypothesis is that the sequence detected in L4-100K that is necessary for early expression of L4-  
284 22K and L4-33K might instead encode for a *cis*-regulatory element that mediates the early  
285 accumulation of these two products produced from the major late promoter.

286 Of the novel transcripts we have so far detected, all of them appear to display delayed late  
287 kinetics during infection. Of particular interest is the transcript encoding for a putative fusion event  
288 between the E4 transcriptional unit and the E2 transcriptional unit. This transcript, E4orf6/DBP,  
289 would have to skip the canonical E4 CPAS for the pre-mRNA to progress downstream to DBP for  
290 splicing. The three transcripts displaying this pattern, including E4-promoter driven DBP and  
291 frameshifted E4-Unk, are all much more abundant during the late phase of infection even though  
292 canonical E4 transcripts are expressed early. It will be very interesting to see if differential  
293 polyadenylation is regulated during the life cycle of the virus, as has been previously reported for  
294 herpes simplex virus [57,74,79]. Importantly, future research should identify whether the known  
295 functions of existing viral ORFs can be explained, at least in part, by the presence of these novel  
296 isoforms.

297 **Methods**

298 ***Cell Culture***

299 A549 cells (ATCC CCL-185) were obtained from American Type Culture Collection  
300 (ATCC) and cultured at 37 °C and 5% CO<sub>2</sub>. Cells were maintained in Ham's F-12K medium  
301 (Gibco, 21127-022) supplemented with 10% v/v FBS (VWR, 89510-186) and 1% v/v Pen/Strep  
302 (100 U/ml of penicillin, 100 µg/ml of streptomycin, Gibco, 15140-122). All cell lines tested negative  
303 for mycoplasma infection and were routinely tested afterwards using the LookOut Mycoplasma  
304 PCR Detection Kit (Sigma-Aldrich).

305

306 ***Viral infections***

307 Adenovirus serotype 5 (Ad5) was originally purchased from ATCC. All viruses were  
308 expanded on HEK293 cells, purified using two sequential rounds of ultracentrifugation in CsCl  
309 gradients, and stored in 40% v/v glycerol at -20 °C (short term) or -80 °C (long term). Viral stock  
310 titer was determined on HEK293 cells by plaque assay, and all subsequent infections were  
311 performed at a multiplicity of infection (MOI) of 10 PFU/cell. Cells were infected at 80-90%  
312 confluent monolayers by incubation with diluted virus in a minimal volume of low serum (2%) F-  
313 12K for two hours. After infection viral inoculum was removed by vacuum and full serum growth  
314 media was replaced for the duration of the experiment.

315

316 ***RNA Isolation***

317 Total RNA was isolated from cells by either TRIzol extraction (Thermo Fisher) or RNeasy  
318 Micro kit (Qiagen), following manufacturer protocols. RNA was treated with RNase-free DNase I  
319 (Qiagen), either on-column or after ethanol precipitation. To test quality, RNA was converted to  
320 complementary DNA (cDNA) using 1 µg of input RNA in the High Capacity RNA-to-cDNA kit  
321 (Thermo Fisher). Quantitative PCR was performed using the standard protocol for SYBR Green  
322 reagents (Thermo Fisher) in a QuantStudio 7 Flex Real-Time PCR System (Applied Biosystems).

323

324 ***Illumina Sequencing and Mapping***

325 Total RNA from three biological replicates of Control knockdown or three biological  
326 replicates of METTL3-knockdown A549 cells infected with Ad5 for 24 hours were sent to Genewiz  
327 for preparation into strand-specific RNA-Seq libraries. Libraries were then run spread over three  
328 lanes of an Illumina HiSeq 2500 using a 150bp paired-end protocol. Raw reads were mapped to  
329 the GRCh37/hg19 genome assembly and the Ad5 genome using the RNA-seq aligner GSNAP  
330 [65] (version 2019-09-12). The algorithm was given known human gene models provided by  
331 GENCODE (release\_27\_hg19) to achieve higher mapping accuracy. We used R package ggplot2  
332 for visualization. Downstream analysis and visualization was done using deepTools2 [80]. Splice  
333 junctions were extracted using regtools [81] and visualized in Integrative Genomics Viewer [82].

334

### 335 ***Variant Calling***

336 Illumina RNA-seq reads were aligned to the Ad5 genome obtained from NCBI  
337 ([https://www.ncbi.nlm.nih.gov/nuccore/AC\\_000008](https://www.ncbi.nlm.nih.gov/nuccore/AC_000008)) using GSNAP [65]. To identify variants such  
338 as single nucleotide polymorphisms (SNPs) and insertions/deletions (InDels), we combined  
339 mpileup and call from the bcftools (v1.9) package [61,62]. Here we used the following flags “--  
340 redo-BAQ --min-BQ 30 --per-sample-mF” and “--multiallelic-caller --variants-only” respectively.  
341 Finally, we only considered variants if they were called significantly in all 3 replicates. We only  
342 observed SNPs but no InDels.

343

### 344 ***Direct RNA Sequencing on nanopore arrays***

345 Direct RNA sequencing libraries were generated from 800-900 ng of poly(A) RNA, isolated  
346 using the Dynabeads™ mRNA Purification Kit (Invitrogen, 61006). Isolated poly(A) RNA was  
347 subsequently spiked with 0.3 µl of a synthetic Enolase 2 (ENO2) calibration RNA (Oxford  
348 Nanopore Technologies Ltd.) and prepared for sequencing using standard protocol steps  
349 previously described [57,64]. Sequencing was carried out on a MinION Mk1b with R9.4.1 (rev D)  
350 flow cells (Oxford Nanopore Technologies Ltd.) for 20 hours and generated 550,000-770,000  
351 sequence reads per dataset. Raw fast5 datasets were basecalled using Guppy v3.2.2 (-f FLO-  
352 MIN106 -k SQK-RNA002) and subsequently aligned against the adenovirus Ad5 reference  
353 genome (AC\_000008.1) using MiniMap225 (-ax splice -k14 -uf --secondary=no), a splice aware  
354 aligner [66]. Resulting SAM files were parsed using SAMtools v1.3 [83].

355

## 356 ***Defining TSS and CPAS***

357 Transcription start sites (TSS) as well as RNA cleavage and polyadenylation sites were  
358 identified as follows. Sorted BAM files containing sequence reads aligned to the Ad5 genome  
359 were parsed to BED12 files using BEDtools [84], separated by strand, truncated to their 5' and 3'  
360 termini, and output as BED6 files. Peak regions denoting TSS and CPAS were identified using  
361 the HOMER [85] findpeaks module (-o auto -style tss) using a --localSize of 100 and 500 and --  
362 size of 15 and 50 for TSS and CPAS, respectively. TSS peaks were compared against Illumina  
363 annotated splice sites to identify and remove peak artefacts derived from local alignment errors  
364 around splice junctions. To predict CPAS sites on the viral genome, we also used the RNA-seq  
365 aligner ContextMap2 (version 2.7.9) [67] which has poly(A) read mapping implemented on our  
366 short-read data. To run this tool, we used the following optional flags “-aligner\_name bowtie --  
367 polyA --strandspecific”. Due to the previously reported errors when using ContextMap2 at very  
368 high read depth, we chose to randomly subsample 10 million, 20 million and 30 million and run  
369 the tool on each of the subsets. We only report poly(A) sites if they were called in all three  
370 replicates and in at least two of the subsample groups.

371

## 372 ***Splice junction correction and sequence read collapsing***

373 Illumina-assisted correction of splice junctions in direct RNA-Seq data was performed  
374 using FLAIR v1.3 [69] in a stranded manner. Briefly, Illumina reads aligning to the Ad5 genome  
375 were split according to orientation and mapping strand [ -f83 & -f163 (forward) and -f99 & -f147  
376 (reverse) ] and used to produce strand-specific junction files that were filtered to remove junctions  
377 supported by less than 100 Illumina reads. Direct RNA-Seq reads were similarly aligned to the  
378 Ad5 genome and separated according to orientation [ -F4095 (forward) and -f16 (reverse) ] prior  
379 to correction using the FLAIR correct module (default parameters). Resulting BED12 files were  
380 parsed to extend the termini of each individual sequence read to the nearest TSS and CPAS with  
381 BlockStarts and BlockSizes (BED12 cols 11 & 12) corrected to reflect this. BED12 files were  
382 subsequently collapsed by identifying all reads sharing the same BlockStarts and BlockSizes and  
383 reducing these to a single representative. Resulting data were visualized along with the raw read  
384 data using IGV [82] and low abundance isoforms (supported by less than 500 junctional reads or  
385 10 full-length reads from Illumina or nanopore data, respectively) removed prior to producing the  
386 final annotation.

387

388 ***Isoform counting***

389           Using our new Ad5 annotation, we generated a transcriptome database by parsing our  
390 GFF3 file to a BED12 file using the *gff3ToGenePred* and *genePredtoBED* functions within  
391 UCSCutils (<https://github.com/itsvenu/UCSC-Utils-Download>) and subsequently extracting a  
392 fasta sequence for each transcript isoform using the *getfasta* function within BEDtools [84]. Direct  
393 RNA-Seq reads were then aligned against the transcriptome database using parameters  
394 optimized for transcriptome-level alignment (minimap2 -ax map-ont -p 0.99). Isoform counts were  
395 generated by filtering only for primary alignments (SAM flag 0) with a mapping quality (MapQ) >  
396 0.

397

398 **Acknowledgments**

399 We thank members of the Weitzman and Mohr/Wilson Labs for insightful discussions and  
400 input. This work was supported through NIH grants R21-AI130618 and R21-AI147163 (ACW),  
401 and R01-AI145266, R01-AI121321, and R01-CA097093 (MDW). Additional support came from  
402 the NCI T32 Training Grant in Tumor Virology T32-CA115299 (AMP) and Individual National  
403 Research Service Award F32-AI138432 (AMP). We extend special thanks to Ian Mohr (New York  
404 University School of Medicine) for support of DPD in part through National Institutes of Health  
405 (NIH) grants R01-AI073898 and R01-GM056927.

406

407

408 **Data Availability**

409 Basecalled fast5 (Nanopore) and fastq (Illumina) datasets generated as part of this study  
410 can be downloaded from the European Nucleotide Archive (ENA) under the following study  
411 accession: PRJEB35667. The authors declare that all other data supporting the findings of this  
412 study are available within the article and its Supplementary Information files, or are available from  
413 the authors upon request. The newly generated genome and transcriptome annotation can be  
414 found at <https://github.com/dandepledge/Ad5-annotation>.

415

416

417 **Author Contributions**

418 A.M.P. and M.D.W. conceived of the project and designed the experiments; D.P.D. and A.C.W.  
419 provided additional input into study design; A.M.P. performed the experiments and Illumina  
420 sequencing; D.P.D. performed the nanopore sequencing; K.E.H. and D.P.D. performed  
421 computational analyses; A.M.P. and D.P.D analyzed all additional data; A.M.P. and M.D.W. wrote  
422 the manuscript; All authors read, edited, and approved the final paper.

423

424 **Figures**

425

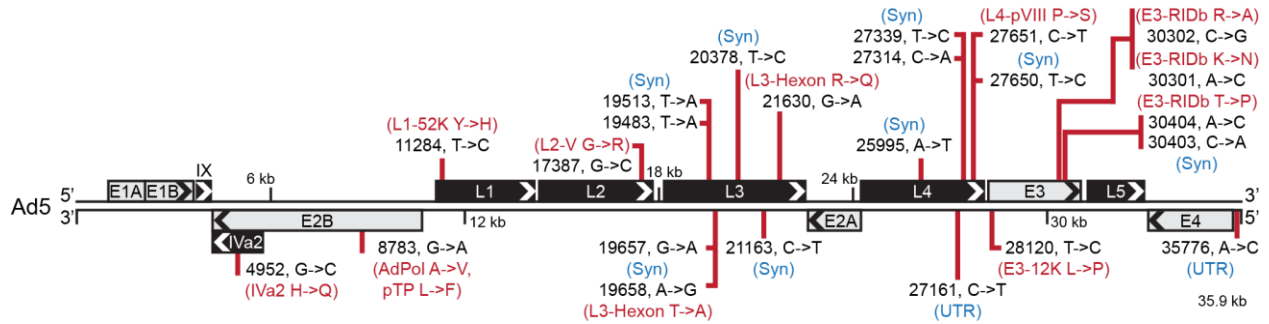

426

427 **Figure 1. RNA-seq reveals high-confidence SNPs within the Ad5 genome.** The 35,938 base  
 428 pair linear genome of Ad5 is displayed in the traditional left to right format. Major transcriptional  
 429 units are shown as boxes above or below the genome with arrowheads denoting the orientation  
 430 of the open reading frames (ORFs) encoded within. Grey boxes denote early gene transcriptional  
 431 units while black boxes denote late genes. Bcftools was used to analyze short-read RNA seq data  
 432 to predict single nucleotide polymorphisms (SNPs) and insertions/deletions (InDels) that  
 433 approach 100% of the RNA reads when compared to the reference Ad5 genome (AC\_000008).  
 434 In total, 23 such SNPs were discovered and their position within the genome is highlighted by a  
 435 red vertical line. For each SNP, the nucleotide position as well as the top strand reference base  
 436 and corrected base are shown in black text (nucleotide position, reference base -> corrected  
 437 base). If indicated SNPs fell within untranslated regions (UTR), or did not change the encoded  
 438 amino acid of any annotated reading frame potentially impacted by the SNP, these were marked  
 439 with blue text denoting either UTR or Syn (synonymous mutation), respectively. For any SNP that  
 440 led to an amino acid change within an annotated ORF, these ORFs as well as the identity of the  
 441 reference amino acid and corrected amino acid are highlighted in red.

442



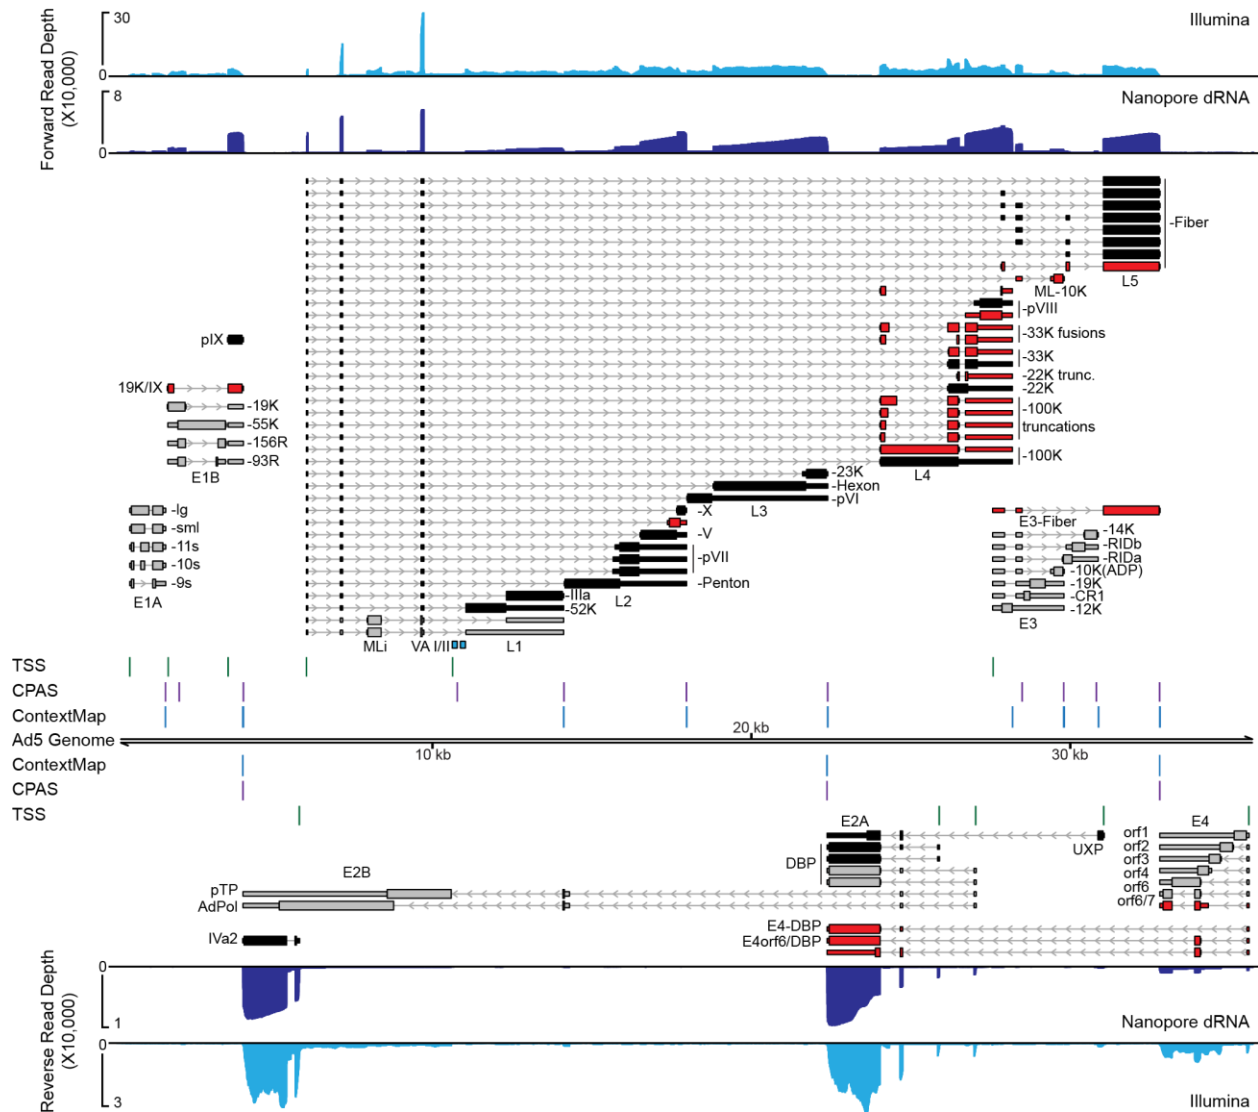

443

444 **Figure 2. Combined short-read and long-read sequencing showcases adenovirus**  
 445 **transcriptome complexity.** A549 cells were infected with Ad5 for 24 hours before RNA was  
 446 extracted and subjected to both short-read and long-read sequencing. Sequence coverage  
 447 provided by short-read stranded RNA-seq (Illumina, light blue), as well as nanopore long-read  
 448 direct RNA-seq (Nanopore dRNA, dark blue), is shown along the Ad5 genome. For both tracks,  
 449 reads aligning to the forward strand are plotted above the genome, while reads aligning to the  
 450 reverse strand are shown below. For dRNA-seq datasets, reads can be reduced to their 5' and 3'  
 451 ends and peak-calling applied to predict individual transcription start sites (TSS, green vertical  
 452 lines) or cleavage and polyadenylation sites (CPAS, magenta vertical lines), respectively.  
 453 Similarly, the ContextMap algorithm can predict, albeit at lower sensitivity, CPAS sites from  
 454 poly(A) containing fragments within Illumina RNA-seq data (ContextMap, light blue vertical lines).  
 455 Individual RNA transcripts are shown above and below the genome, thin bars denote 5' and 3'  
 456 untranslated regions (UTR), thick bars denote open reading frames (ORFs), and thin lines with  
 457 arrowheads denote both introns and orientation of transcription. Previously characterized early  
 458 genes are denoted in grey, while previously characterized late genes are denoted in black. RNA  
 459 isoforms discovered in this study are highlighted in red. Names of transcriptional units are shown

460 under each cluster of transcripts, while the name of the protein derived from the respective ORF  
 461 is listed after each transcript. The position of Pol III-derived noncoding RNAs virus associated VA-  
 462 I and VA-II are highlighted in teal boxes.

463  
 464  
 465  
 466  
 467

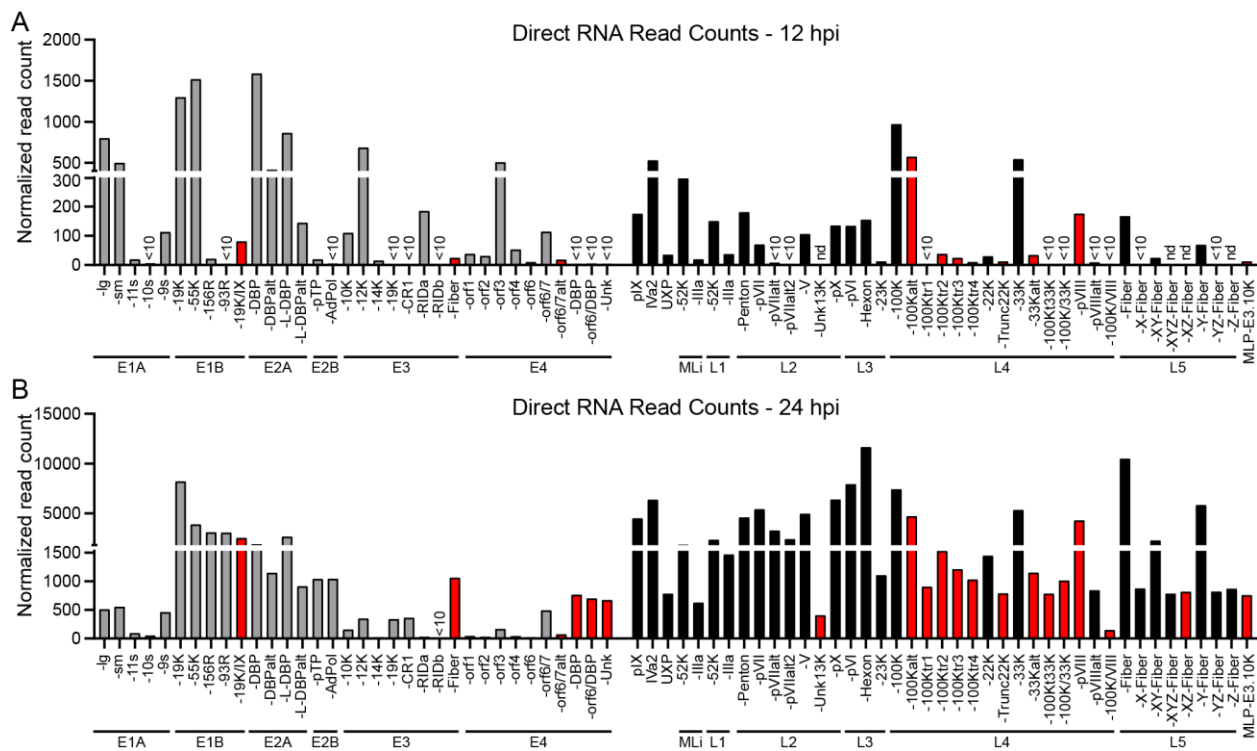

468 **Figure 3. Direct RNA Sequencing (dRNA-seq) unambiguously distinguishes early and late**  
 469 **transcription. (A)** dRNA-seq was performed on polyadenylated RNA from Ad5-infected A549  
 470 cells extracted at 12 hours post infection (hpi). Sequence reads were aligned to the re-annotated  
 471 transcriptome and filtered to retain only unambiguous primary alignments. Normalized read count  
 472 indicates the number of RNAs for a particular transcript once normalized to the total number of  
 473 mappable reads (human plus adenovirus) for the entire sequencing reaction. For all panels, grey  
 474 bars indicate early genes, black bars indicate late genes, and red bars indicate novel isoforms  
 475 discovered in this study. Particular transcripts are highlighted if there were less than 10 counts of  
 476 a particular isoform detected (<10), or if the RNA was undetectable at that time point (nd). **(B)**  
 477 Same as in Panel A, but with RNA harvested at 24 hpi.

479  
 480

481 **References**

- 482 1. Arnold J. Berk. Adenoviridae. 6th ed. In: David M. Knipe, Peter M. Howley, editors. Fields  
483 Virology. 6th ed. Philadelphia: Wolters Kluwer Health/Lippincott Williams & Wilkins; 2013.  
484 pp. 1704–1731.
- 485 2. Khanal S, Ghimire P, Dhamoon AS. The Repertoire of Adenovirus in Human Disease: The  
486 Innocuous to the Deadly. *Biomedicines*. 2018;6. doi:10.3390/biomedicines6010030
- 487 3. Chroboczek J, Bieber F, Jacrot B. The sequence of the genome of adenovirus type 5 and its  
488 comparison with the genome of adenovirus type 2. *Virology*. 1992;186: 280–285.  
489 doi:10.1016/0042-6822(92)90082-z
- 490 4. Davison AJ, Benko M, Harrach B. Genetic content and evolution of adenoviruses. *J Gen  
491 Virol*. 2003;84: 2895–2908. doi:10.1099/vir.0.19497-0
- 492 5. Berk AJ. Recent lessons in gene expression, cell cycle control, and cell biology from  
493 adenovirus. *Oncogene*. 2005;24: 7673–85. doi:10.1038/sj.onc.1209040
- 494 6. Chow LT, Gelinas RE, Broker TR, Roberts RJ. An amazing sequence arrangement at the 5'  
495 ends of adenovirus 2 messenger RNA. *Cell*. 1977;12: 1–8.
- 496 7. Berget SM, Moore C, Sharp PA. Spliced segments at the 5' terminus of adenovirus 2 late  
497 mRNA. *PNAS*. 1977;74: 3171–3175. doi:10.1073/pnas.74.8.3171
- 498 8. Sommer S, Salditt-Georgieff M, Bachenheimer S, Darnell JE, Furuichi Y, Morgan M, et al.  
499 The methylation of adenovirus-specific nuclear and cytoplasmic RNA. *Nucleic Acids Res*.  
500 1976;3: 749–65.
- 501 9. Philipson L, Wall R, Glickman G, Darnell JE. Addition of polyadenylate sequences to virus-  
502 specific RNA during adenovirus replication. *Proc Natl Acad Sci U S A*. 1971;68: 2806–9.
- 503 10. Berk AJ. Discovery of RNA splicing and genes in pieces. *Proc Natl Acad Sci USA*.  
504 2016;113: 801–805. doi:10.1073/pnas.1525084113
- 505 11. Montell C, Fisher EF, Caruthers MH, Berk AJ. Resolving the functions of overlapping viral  
506 genes by site-specific mutagenesis at a mRNA splice site. *Nature*. 1982;295: 380–384.  
507 doi:10.1038/295380a0
- 508 12. Winberg G, Shenk T. Dissection of overlapping functions within the adenovirus type 5 E1A  
509 gene. *EMBO J*. 1984;3: 1907–1912.
- 510 13. Fonseca GJ, Thillainadesan G, Yousef AF, Ablack JN, Mossman KL, Torchia J, et al.  
511 Adenovirus evasion of interferon-mediated innate immunity by direct antagonism of a  
512 cellular histone posttranslational modification. *Cell Host Microbe*. 2012;11: 597–606.  
513 doi:10.1016/j.chom.2012.05.005
- 514 14. Zemke NR, Berk AJ. The Adenovirus E1A C Terminus Suppresses a Delayed Antiviral  
515 Response and Modulates RAS Signaling. *Cell Host & Microbe*. 2017;22: 789-800.e5.  
516 doi:10.1016/j.chom.2017.11.008

- 517 15. Pelka P, Ablack JNG, Fonseca GJ, Yousef AF, Mymryk JS. Intrinsic Structural Disorder in  
518 Adenovirus E1A: a Viral Molecular Hub Linking Multiple Diverse Processes. *Journal of*  
519 *Virology*. 2008;82: 7252–7263. doi:10.1128/JVI.00104-08
- 520 16. Blackford AN, Grand RJA. Adenovirus E1B 55-Kilodalton Protein: Multiple Roles in Viral  
521 Infection and Cell Transformation. *Journal of Virology*. 2009;83: 4000–4012.  
522 doi:10.1128/JVI.02417-08
- 523 17. Han J, Sabbatini P, Perez D, Rao L, Modha D, White E. The E1B 19K protein blocks  
524 apoptosis by interacting with and inhibiting the p53-inducible and death-promoting Bax  
525 protein. *Genes Dev*. 1996;10: 461–477. doi:10.1101/gad.10.4.461
- 526 18. Yew PR, Berk AJ. Inhibition of p53 transactivation required for transformation by adenovirus  
527 early 1B protein. *Nature*. 1992;357: 82–85. doi:10.1038/357082a0
- 528 19. Bridge E, Ketner G. Interaction of adenoviral E4 and E1b products in late gene expression.  
529 *Virology*. 1990;174: 345–53.
- 530 20. Cathomen T, Weitzman MD. A functional complex of adenovirus proteins E1B-55kDa and  
531 E4orf6 is necessary to modulate the expression level of p53 but not its transcriptional  
532 activity. *J Virol*. 2000;74: 11407–12.
- 533 21. Harada JN, Shevchenko A, Shevchenko A, Pallas DC, Berk AJ. Analysis of the adenovirus  
534 E1B-55K-anchored proteome reveals its link to ubiquitination machinery. *J Virol*. 2002;76:  
535 9194–206.
- 536 22. Querido E, Blanchette P, Yan Q, Kamura T, Morrison M, Boivin D, et al. Degradation of p53  
537 by adenovirus E4orf6 and E1B55K proteins occurs via a novel mechanism involving a  
538 Cullin-containing complex. *Genes Dev*. 2001;15: 3104–17. doi:10.1101/gad.926401
- 539 23. Dybas JM, Herrmann C, Weitzman MD. Ubiquitination at the interface of tumor viruses and  
540 DNA damage responses. *Curr Opin Virol*. 2018;32: 40–47. doi:10.1016/j.coviro.2018.08.017
- 541 24. Winnacker EL. Adenovirus DNA: structure and function of a novel replicon. *Cell*. 1978;14:  
542 761–773. doi:10.1016/0092-8674(78)90332-x
- 543 25. Webster A, Leith IR, Nicholson J, Hounsell J, Hay RT. Role of preterminal protein  
544 processing in adenovirus replication. *J Virol*. 1997;71: 6381–6389.
- 545 26. Brenkman AB, Breure EC, van der Vliet PC. Molecular architecture of adenovirus DNA  
546 polymerase and location of the protein primer. *J Virol*. 2002;76: 8200–8207.  
547 doi:10.1128/jvi.76.16.8200-8207.2002
- 548 27. de Jong RN, van der Vliet PC, Brenkman AB. Adenovirus DNA replication: protein priming,  
549 jumping back and the role of the DNA binding protein DBP. *Curr Top Microbiol Immunol*.  
550 2003;272: 187–211. doi:10.1007/978-3-662-05597-7\_7
- 551 28. Robinson CM, Rajaiya J, Zhou X, Singh G, Dyer DW, Chodosh J. The E3 CR1-gamma  
552 gene in human adenoviruses associated with epidemic keratoconjunctivitis. *Virus Res*.  
553 2011;160: 120–127. doi:10.1016/j.virusres.2011.05.022

- 554 29. Singh G, Robinson CM, Dehghan S, Jones MS, Dyer DW, Seto D, et al. Homologous  
555 recombination in E3 genes of human adenovirus species D. *J Virol.* 2013;87: 12481–12488.  
556 doi:10.1128/JVI.01927-13
- 557 30. Wold WSM, Tollefson AE, Hermiston TW. E3 Transcription Unit of Adenovirus. In: Doerfler  
558 W, Böhm P, editors. *The Molecular Repertoire of Adenoviruses I: Virion Structure and*  
559 *Infection.* Berlin, Heidelberg: Springer; 1995. pp. 237–274. doi:10.1007/978-3-642-79496-  
560 4\_13
- 561 31. Bridge E, Ketner G. Redundant control of adenovirus late gene expression by early region  
562 4. *J Virol.* 1989;63: 631–8.
- 563 32. Weitzman MD. Functions of the adenovirus E4 proteins and their impact on viral vectors.  
564 *Front Biosci.* 2005;10: 1106–17.
- 565 33. Weitzman MD, Ornelles DA. Inactivating intracellular antiviral responses during adenovirus  
566 infection. *Oncogene.* 2005;24: 7686–96. doi:10.1038/sj.onc.1209063
- 567 34. Weinmann R, Raskas HJ, Roeder RG. Role of DNA-dependent RNA polymerases II and III  
568 in transcription of the adenovirus genome late in productive infection. *Proc Natl Acad Sci*  
569 *USA.* 1974;71: 3426–3439. doi:10.1073/pnas.71.9.3426
- 570 35. Vachon VK, Conn GL. Adenovirus VA RNA: An essential pro-viral non-coding RNA. *Virus*  
571 *Res.* 2016;212: 39–52. doi:10.1016/j.virusres.2015.06.018
- 572 36. Hoeben RC, Uil TG. Adenovirus DNA Replication. *Cold Spring Harb Perspect Biol.* 2013;5.  
573 doi:10.1101/cshperspect.a013003
- 574 37. Shaw AR, Ziff EB. Transcripts from the adenovirus-2 major late promoter yield a single early  
575 family of 3' coterminal mRNAs and five late families. *Cell.* 1980;22: 905–916.  
576 doi:10.1016/0092-8674(80)90568-1
- 577 38. Parks RJ. Adenovirus protein IX: a new look at an old protein. *Mol Ther.* 2005;11: 19–25.  
578 doi:10.1016/j.ymthe.2004.09.018
- 579 39. Zhang W, Imperiale MJ. Requirement of the adenovirus IVa2 protein for virus assembly. *J*  
580 *Viol.* 2003;77: 3586–3594. doi:10.1128/jvi.77.6.3586-3594.2003
- 581 40. Carter TH, Ginsberg HS. Viral transcription in KB cells infected by temperature-sensitive  
582 “early” mutants of adenovirus type 5. *J Virol.* 1976;18: 156–166.
- 583 41. Crossland LD, Raskas HJ. Identification of adenovirus genes that require template  
584 replication for expression. *J Virol.* 1983;46: 737–748.
- 585 42. Thomas GP, Mathews MB. DNA replication and the early to late transition in adenovirus  
586 infection. *Cell.* 1980;22: 523–533. doi:10.1016/0092-8674(80)90362-1
- 587 43. Ramke M, Lee JY, Dyer DW, Seto D, Rajaiya J, Chodosh J. The 5'UTR in human  
588 adenoviruses: leader diversity in late gene expression. *Sci Rep.* 2017;7: 618.  
589 doi:10.1038/s41598-017-00747-y

- 590 44. Soloway PD, Shenk T. The adenovirus type 5 i-leader open reading frame functions in cis to  
591 reduce the half-life of L1 mRNAs. *J Virol.* 1990;64: 551–558.
- 592 45. Morris SJ, Scott GE, Leppard KN. Adenovirus Late-Phase Infection Is Controlled by a Novel  
593 L4 Promoter. *J Virol.* 2010;84: 7096–7104. doi:10.1128/JVI.00107-10
- 594 46. Biasiotta R, Akusjärvi G. Regulation of Human Adenovirus Alternative RNA Splicing by the  
595 Adenoviral L4-33K and L4-22K Proteins. *Int J Mol Sci.* 2015;16: 2893–2912.  
596 doi:10.3390/ijms16022893
- 597 47. Tollefson AE, Ying B, Doronin K, Sidor PD, Wold WSM. Identification of a New Human  
598 Adenovirus Protein Encoded by a Novel Late I-Strand Transcription Unit. *Journal of*  
599 *Virology.* 2007;81: 12918–12926. doi:10.1128/JVI.01531-07
- 600 48. Ying B, Tollefson AE, Wold WSM. Identification of a Previously Unrecognized Promoter  
601 That Drives Expression of the UXP Transcription Unit in the Human Adenovirus Type 5  
602 Genome. *J Virol.* 2010;84: 11470–11478. doi:10.1128/JVI.01338-10
- 603 49. Miller DL, Myers CL, Rickards B, Collier HA, Flint SJ. Adenovirus type 5 exerts genome-wide  
604 control over cellular programs governing proliferation, quiescence, and survival. *Genome*  
605 *Biology.* 2007;8: R58. doi:10.1186/gb-2007-8-4-r58
- 606 50. Miller DL, Rickards B, Mashiba M, Huang W, Flint SJ. The adenoviral E1B 55-kilodalton  
607 protein controls expression of immune response genes but not p53-dependent transcription.  
608 *J Virol.* 2009;83: 3591–3603. doi:10.1128/JVI.02269-08
- 609 51. Zhao H, Dahlö M, Isaksson A, Syvänen A-C, Pettersson U. The transcriptome of the  
610 adenovirus infected cell. *Virology.* 2012;424: 115–128. doi:10.1016/j.virol.2011.12.006
- 611 52. Zhao H, Chen M, Valdés A, Lind SB, Pettersson U. Transcriptomic and proteomic analyses  
612 reveal new insights into the regulation of immune pathways during adenovirus type 2  
613 infection. *BMC Microbiol.* 2019;19: 15. doi:10.1186/s12866-018-1375-5
- 614 53. Zhao H, Chen M, Pettersson U. A new look at adenovirus splicing. *Virology.* 2014;456–457:  
615 329–341. doi:10.1016/j.virol.2014.04.006
- 616 54. Crisostomo L, Soriano AM, Mendez M, Graves D, Pelka P. Temporal dynamics of  
617 adenovirus 5 gene expression in normal human cells. *PLOS ONE.* 2019;14: e0211192.  
618 doi:10.1371/journal.pone.0211192
- 619 55. Brandes N, Linial M. Gene overlapping and size constraints in the viral world. *Biology Direct.*  
620 2016;11: 26. doi:10.1186/s13062-016-0128-3
- 621 56. O’Grady T, Wang X, Höner zu Bentrup K, Baddoo M, Concha M, Flemington EK. Global  
622 transcript structure resolution of high gene density genomes through multi-platform data  
623 integration. *Nucleic Acids Res.* 2016;44: e145–e145. doi:10.1093/nar/gkw629
- 624 57. Depledge DP, Srinivas KP, Sadaoka T, Bready D, Mori Y, Placantonakis DG, et al. Direct  
625 RNA sequencing on nanopore arrays redefines the transcriptional complexity of a viral  
626 pathogen. *Nat Commun.* 2019;10: 1–13. doi:10.1038/s41467-019-08734-9

- 627 58. Tombácz D, Balázs Z, Csabai Z, Moldován N, Szűcs A, Sharon D, et al. Characterization of  
628 the Dynamic Transcriptome of a Herpesvirus with Long-read Single Molecule Real-Time  
629 Sequencing. *Sci Rep.* 2017;7: 43751. doi:10.1038/srep43751
- 630 59. Viehweger A, Krautwurst S, Lamkiewicz K, Madhugiri R, Ziebuhr J, Hölzer M, et al. Direct  
631 RNA nanopore sequencing of full-length coronavirus genomes provides novel insights into  
632 structural variants and enables modification analysis. *Genome Res.* 2019;29: 1545–1554.  
633 doi:10.1101/gr.247064.118
- 634 60. Weirather JL, de Cesare M, Wang Y, Piazza P, Sebastiano V, Wang X-J, et al.  
635 Comprehensive comparison of Pacific Biosciences and Oxford Nanopore Technologies and  
636 their applications to transcriptome analysis. *F1000Res.* 2017;6: 100.  
637 doi:10.12688/f1000research.10571.2
- 638 61. Danecek P, Auton A, Abecasis G, Albers CA, Banks E, DePristo MA, et al. The variant call  
639 format and VCFtools. *Bioinformatics.* 2011;27: 2156–2158.  
640 doi:10.1093/bioinformatics/btr330
- 641 62. Narasimhan V, Danecek P, Scally A, Xue Y, Tyler-Smith C, Durbin R. BCFtools/RoH: a  
642 hidden Markov model approach for detecting autozygosity from next-generation sequencing  
643 data. *Bioinformatics.* 2016;32: 1749–1751. doi:10.1093/bioinformatics/btw044
- 644 63. Li X, Xiong X, Yi C. Epitranscriptome sequencing technologies: decoding RNA  
645 modifications. *Nat Methods.* 2017;14: 23–31. doi:10.1038/nmeth.4110
- 646 64. Garalde DR, Snell EA, Jachimowicz D, Sipos B, Lloyd JH, Bruce M, et al. Highly parallel  
647 direct RNA sequencing on an array of nanopores. *Nat Methods.* 2018;15: 201–206.  
648 doi:10.1038/nmeth.4577
- 649 65. Wu TD, Reeder J, Lawrence M, Becker G, Brauer MJ. GMAP and GSNAP for Genomic  
650 Sequence Alignment: Enhancements to Speed, Accuracy, and Functionality. *Methods Mol  
651 Biol.* 2016;1418: 283–334. doi:10.1007/978-1-4939-3578-9\_15
- 652 66. Li H. Minimap2: pairwise alignment for nucleotide sequences. *Bioinformatics.* 2018;34:  
653 3094–3100. doi:10.1093/bioinformatics/bty191
- 654 67. Bonfert T, Friedel CC. Prediction of Poly(A) Sites by Poly(A) Read Mapping. *PLoS ONE.*  
655 2017;12: e0170914. doi:10.1371/journal.pone.0170914
- 656 68. Borodulina OR, Kramerov DA. Transcripts synthesized by RNA polymerase III can be  
657 polyadenylated in an AAUAAA-dependent manner. *RNA.* 2008;14: 1865–1873.  
658 doi:10.1261/rna.1006608
- 659 69. Tang AD, Soulette CM, Baren MJ van, Hart K, Hrabeta-Robinson E, Wu CJ, et al. Full-  
660 length transcript characterization of SF3B1 mutation in chronic lymphocytic leukemia  
661 reveals downregulation of retained introns. *bioRxiv.* 2018; 410183. doi:10.1101/410183
- 662 70. Hidalgo P, Anzures L, Hernández-Mendoza A, Guerrero A, Wood CD, Valdés M, et al.  
663 Morphological, Biochemical, and Functional Study of Viral Replication Compartments  
664 Isolated from Adenovirus-Infected Cells. *Journal of Virology.* 2016;90: 3411–3427.  
665 doi:10.1128/JVI.00033-16

- 666 71. Stern-Ginossar N, Weisburd B, Michalski A, Le VTK, Hein MY, Huang S-X, et al. Decoding  
667 human cytomegalovirus. *Science*. 2012;338: 1088–1093. doi:10.1126/science.1227919
- 668 72. Arvey A, Tempera I, Tsai K, Chen H-S, Tikhmyanova N, Klichinsky M, et al. An Atlas of the  
669 Epstein-Barr Virus Transcriptome and Epigenome Reveals Host-Virus Regulatory  
670 Interactions. *Cell Host Microbe*. 2012;12: 233–245. doi:10.1016/j.chom.2012.06.008
- 671 73. Arias C, Weisburd B, Stern-Ginossar N, Mercier A, Madrid AS, Bellare P, et al. KSHV 2.0: A  
672 Comprehensive Annotation of the Kaposi's Sarcoma-Associated Herpesvirus Genome  
673 Using Next-Generation Sequencing Reveals Novel Genomic and Functional Features.  
674 *PLOS Pathogens*. 2014;10: e1003847. doi:10.1371/journal.ppat.1003847
- 675 74. Rutkowski AJ, Erhard F, L'Hernault A, Bonfert T, Schilhabel M, Crump C, et al. Widespread  
676 disruption of host transcription termination in HSV-1 infection. *Nat Commun*. 2015;6: 7126.  
677 doi:10.1038/ncomms8126
- 678 75. Garren SB, Kondaveeti Y, Duff MO, Carmichael GG. Global Analysis of Mouse  
679 Polyomavirus Infection Reveals Dynamic Regulation of Viral and Host Gene Expression and  
680 Promiscuous Viral RNA Editing. *PLoS Pathog*. 2015;11: e1005166.  
681 doi:10.1371/journal.ppat.1005166
- 682 76. Evans VC, Barker G, Heesom KJ, Fan J, Bessant C, Matthews DA. De novo derivation of  
683 proteomes from transcriptomes for transcript and protein identification. *Nat Methods*.  
684 2012;9: 1207–1211. doi:10.1038/nmeth.2227
- 685 77. Wright J, Leppard KN. The Human Adenovirus 5 L4 Promoter Is Activated by Cellular Stress  
686 Response Protein p53. *J Virol*. 2013;87: 11617–11625. doi:10.1128/JVI.01924-13
- 687 78. Wright J, Atwan Z, Morris SJ, Leppard KN. The Human Adenovirus Type 5 L4 Promoter Is  
688 Negatively Regulated by TFII-I and L4-33K. *Journal of Virology*. 2015;89: 7053–7063.  
689 doi:10.1128/JVI.00683-15
- 690 79. Hennig T, Michalski M, Rutkowski AJ, Djakovic L, Whisnant AW, Friedl MS, et al. HSV-1-  
691 induced disruption of transcription termination resembles a cellular stress response but  
692 selectively increases chromatin accessibility downstream of genes. *PLoS Pathog*. 2018;14:  
693 e1006954. doi:10.1371/journal.ppat.1006954
- 694 80. Ramírez F, Ryan DP, Grüning B, Bhardwaj V, Kilpert F, Richter AS, et al. deepTools2: a  
695 next generation web server for deep-sequencing data analysis. *Nucleic Acids Res*. 2016;44:  
696 W160-165. doi:10.1093/nar/gkw257
- 697 81. Feng Y-Y, Ramu A, Cotto KC, Skidmore ZL, Kunisaki J, Conrad DF, et al. RegTools:  
698 Integrated analysis of genomic and transcriptomic data for discovery of splicing variants in  
699 cancer. *bioRxiv*. 2018; 436634. doi:10.1101/436634
- 700 82. Robinson JT, Thorvaldsdóttir H, Winckler W, Guttman M, Lander ES, Getz G, et al.  
701 Integrative Genomics Viewer. *Nat Biotechnol*. 2011;29: 24–26. doi:10.1038/nbt.1754
- 702 83. Li H, Handsaker B, Wysoker A, Fennell T, Ruan J, Homer N, et al. The Sequence  
703 Alignment/Map format and SAMtools. *Bioinformatics*. 2009;25: 2078–2079.  
704 doi:10.1093/bioinformatics/btp352



- 705 84. Quinlan AR, Hall IM. BEDTools: a flexible suite of utilities for comparing genomic features.  
706 Bioinformatics. 2010;26: 841–842. doi:10.1093/bioinformatics/btq033
- 707 85. Heinz S, Benner C, Spann N, Bertolino E, Lin YC, Laslo P, et al. Simple combinations of  
708 lineage-determining transcription factors prime cis-regulatory elements required for  
709 macrophage and B cell identities. Mol Cell. 2010;38: 576–589.  
710 doi:10.1016/j.molcel.2010.05.004

711
